# Supplementary material for: Importance of Pre-Milking Udder Hygiene to Reduce Transfer of Clostridial Spores from Teat Skin to Raw Milk
Source: MDPI journal article supplement (doi:10.3390/microorganisms11051337), 2023-05-19
Supplement: s1 [file s1]

| Farm                                                                     | A                                                              | B                                                              | C                                      | D                                 | E                                 | F                                              | G                            | H                                                      |
|--------------------------------------------------------------------------|----------------------------------------------------------------|----------------------------------------------------------------|----------------------------------------|-----------------------------------|-----------------------------------|------------------------------------------------|------------------------------|--------------------------------------------------------|
| <b>Total number of dairy cows (number of lactating cows)<sup>1</sup></b> | 23 (21)                                                        | 28 (23)                                                        | 40 (34)                                | 22 (20)                           | 30 (25)                           | 19 (16)                                        | 50 (44)                      | 18 (16)                                                |
| <b>Main cow breed</b>                                                    | HF                                                             | SI                                                             | BS                                     | SI                                | HF                                | SI                                             | BS                           | SI                                                     |
| <b>Milk yield/cow [kg]<sup>1</sup></b>                                   | 25.7                                                           | 25.6                                                           | 26.7                                   | 16.6                              | 25.3                              | 21.0                                           | 30.8                         | 31.3                                                   |
| <b>Housing and milking technique</b>                                     | Free stall<br>Herringbone milking parlor (MP)                  | Free stall<br>Tandem MP                                        | Free stall<br>Tandem MP                | Tie stall<br>Pipe milking         | Free stall<br>Tandem MP           | Tie stall<br>Pipe milking                      | Free stall<br>Herringbone MP | Free stall<br>Tandem MP                                |
| <b>Main feed<sup>2</sup></b>                                             | Grass silage                                                   | Grass silage                                                   | Clover grass silage                    | Grass silage                      | Grass silage                      | Grass silage (2, 5)<br>Pasture grass (1, 3, 4) | Grass silage                 | Grass silage                                           |
| <b>Additional feed<sup>2</sup></b>                                       | Corn silage (1, 3, 5)<br>Pasture grass (1, 3, 4)<br>Hay (2, 5) | Corn silage (1, 2, 5)<br>Pasture grass (1, 4)<br>Hay (2, 3, 5) | Corn silage (2-5)<br>Pasture grass (4) | Pasture grass (1, 4)<br>Hay (1-5) | Corn silage (1-3, 5)<br>Hay (1-5) | Hay                                            | Corn silage<br>Alfalfa hay   | Corn silage (1-5)<br>Pasture grass (1, 4)<br>Hay (1-5) |

|                                                                                      |                                                |                                                                |                                                                |                                                              |                                                              |                                                                      |                                          |                                                |                                                                    |
|--------------------------------------------------------------------------------------|------------------------------------------------|----------------------------------------------------------------|----------------------------------------------------------------|--------------------------------------------------------------|--------------------------------------------------------------|----------------------------------------------------------------------|------------------------------------------|------------------------------------------------|--------------------------------------------------------------------|
| Milking order <sup>3</sup>                                                           | rank                                           | ✓                                                              | ✗                                                              | ✗                                                            | ✓                                                            | ✗                                                                    | ✓                                        | ✗                                              | ✗                                                                  |
| Separate milking cluster for waste milk from animals with health issues <sup>3</sup> |                                                | ✗                                                              | ✓                                                              | ✓                                                            | ✓                                                            | ✗                                                                    | ✓                                        | ✗                                              | ✓                                                                  |
| Teat cleaning                                                                        | Dry paper towel (single use, one item per cow) | Cleaning foam + dry paper towel (single use, one item per cow) | Cleaning foam + dry udder cloth (single use, one item per cow) | - Udder towel (1, 2, 4; reusable, one item for several cows) | - Udder cloth (3, 5; single use, one item for max. two cows) | - Sponge cloth in disinfectant (1; reusable, one cloth for all cows) | Wood wool (single use, one item per cow) | Dry paper towel (single use, one item per cow) | Moist udder cloth + dry udder cloth (single use, one item per cow) |
| Post-milking dipping <sup>4</sup>                                                    | teat                                           | ✓                                                              | ✓                                                              | ✓                                                            | ✗                                                            | ✓                                                                    | ✗                                        | ✓                                              | ✓                                                                  |

|                                                           |                                           |   |   |   |                                             |   |         |   |
|-----------------------------------------------------------|-------------------------------------------|---|---|---|---------------------------------------------|---|---------|---|
| Teat check before cluster attachment (clean & dry)        | ✓                                         | ✓ | ✓ | ✗ | ✗                                           | ✓ | ✗       | ✓ |
| Milking cluster disinfection prior attachment to next cow | ✗ (1-4)                                   | ✗ | ✗ | ✗ | ✗ (1)                                       | ✗ | ✓ (1-4) | ✓ |
|                                                           | ✓ (5, only after cows with health issues) |   |   |   | ✓ (2-5, only after cows with health issues) |   | ✗ (5)   |   |

<sup>1</sup> average from 5 samplings

<sup>2</sup> For statistical analysis “silage” was aggregated for each sampling and farm: 0 = no silage was fed; 1 = one silage type was fed; 2 = two different silage types were fed

<sup>3</sup> For statistical analysis data on “milking procedure” was aggregated for each sampling and farm: 00 = no rank order and no extra cluster; 01 = no rank order but an extra cluster was used; 10 = rank order but no extra cluster was used; 11 = rank order plus extra cluster was used

<sup>4</sup>for statistical analysis data on post-milking dipping (post-dipping) was aggregated for each sampling and farm: 0 = no post-dipping was performed; 1 = the used dipping agent was based on lactic acid; 2 = the used dipping agent was based on iodine

(1, 2, 3, 4, 5) = Sampling on which this information applies; (1: summer '18, 2: winter '18, 3: spring '19, 4: summer '19, 5: winter'19)

✓ = yes

✗ = no

HF = Holstein-Friesian, BS = Brown Swiss, SI = Simmental
